# Supplementary material
Source: PubMed Central journal article supplement (PMC2722268)
Supplement: 0904063106_ST1_PDF.pdf [file 0904063106_ST1_PDF.pdf]

**Table 1.** Comparison between  $\beta(1,3)$ -glucan binding residues in GNBPs.

|                                             | $\beta(1,3)$ -glucan binding residue |    |          |    |   |    |
|---------------------------------------------|--------------------------------------|----|----------|----|---|----|
|                                             | I                                    | II | III      | IV | V | VI |
| <i>N. graveolus</i> GNBP-2                  | E                                    | R  | E        | W  | F | Y  |
| <i>D. rubriceps</i> GNBP-2                  | E                                    | R  | E        | W  | F | Y  |
| <i>M. darwiniensis</i> GNBP-2               | E                                    | R  | E        | W  | Y | Y  |
| <i>N. graveolus</i> GNBP-1                  | E                                    | R  | D        | W  | E | Y  |
| <i>D. rubriceps</i> GNBP-1                  | E                                    | R  | D        | W  | E | Y  |
| <i>M. darwiniensis</i> GNBP-1               | E                                    | R  | D        | W  | E | Y  |
| <i>T. castaneum</i> GNBP                    | E                                    | V  | $\Delta$ | Y  | P | Q  |
| <i>D. melanogaster</i> GNBP-2               | D                                    | H  | N        | M  | Y | F  |
| <i>D. melanogaster</i> GNBP-1               | D                                    | S  | E        | L  | W | Y  |
| <i>B. mori</i> GNBP                         | E                                    | T  | I        | L  | K | Y  |
| <i>H. cunea</i> GNBP                        | E                                    | T  | K        | L  | K | Y  |
| <i>A. gambiae</i> GNBP-A                    | E                                    | T  | T        | Y  | F | Y  |
| <i>A. gambiae</i> GNBP-B                    | E                                    | R  | S        | W  | A | H  |
| <i>B. circulans</i> $\beta(1,3)$ -glucanase | D                                    | N  | D        | W  | V | Y  |

**SUPPORTING TABLE LEGEND****Table 1**

Comparison between  $\beta(1,3)$ -glucan binding residues in GNBPs. Protein sequences were aligned with ClustalW and positions I-VI were extrapolated from computational model. Residue positions (in *N. graveolus* sequence) are: I 56, II 143, III 146, IV 172, V 179, VI 308. Color coding: red=acidic, ochre=hydrophobic, blue=basic, light blue=N/Q, purple=Y, peach=W.  $\Delta$  represents a deletion in the specified residue.
